# Supplementary material for: Prediction of the Wingate anaerobic mechanical power outputs from a maximal incremental cardiopulmonary exercise stress test using machine-learning approach
Source: PubMed Central journal article supplement (PMC6413913; doi:10.1371/journal.pone.0212199), 2019-03-12
Supplement: pone.0212199.s001.pdf [file pone.0212199.s001.pdf]

**Table A in S1 File. Features descriptions**

| <b>Features (N=51)</b>                              | <b>Description</b>                                                                                                                                                    |
|-----------------------------------------------------|-----------------------------------------------------------------------------------------------------------------------------------------------------------------------|
| Max time [s]                                        | Maximal duration of the test                                                                                                                                          |
| Max RF [1/min]                                      | Respiratory frequency which refers to the breathing rate per minute                                                                                                   |
| Max VT [L]                                          | Maximal tidal volume. This is the lung volume that represents the normal volume of air displaced between normal inhalation and exhalation                             |
| Max VE [L/min]                                      | VE refers to minute ventilation. This is calculated by multiplying tidal volume by respiratory frequency                                                              |
| Max VO <sub>2</sub> [mL/min]                        | Maximal volume of oxygen consumption (VO <sub>2</sub> ) during the test                                                                                               |
| Max VCO <sub>2</sub> [mL/min]                       | Maximal volume of carbon dioxide production (VCO <sub>2</sub> ) during the test                                                                                       |
| Max VO <sub>2</sub> [mL/min/Kg]                     | Maximal volume of oxygen consumption during the test, as measured in milliliters per kilogram of body weight per minute                                               |
| Max HR [beat/min]                                   | Maximal heart rate                                                                                                                                                    |
| Max RR                                              | The respiratory quotient, is a dimensionless number calculated from the ratio of carbon dioxide produced by the body to oxygen consumed by the body                   |
| Max VE/VO <sub>2</sub>                              | Maximal minute ventilation divided by maximal volume of oxygen consumption                                                                                            |
| Max VE/VCO <sub>2</sub>                             | Maximal minute ventilation divided by maximal volume of carbon dioxide production                                                                                     |
| VO <sub>2</sub> 1 <sup>st</sup> intersect [mL/min]  | Oxygen consumption value of the 1 <sup>st</sup> intersect when fitting three linear lines to the carbon dioxide production as a function of oxygen consumption        |
| VO <sub>2</sub> 2 <sup>nd</sup> intersect [mL/min]  | Oxygen consumption value of the 2 <sup>nd</sup> intersect when fitting three linear lines to the carbon dioxide production as a function of oxygen consumption        |
| VCO <sub>2</sub> 1 <sup>st</sup> intersect [mL/min] | Carbon dioxide production value of the 1 <sup>st</sup> intersect when fitting three linear lines to the carbon dioxide production as a function of oxygen consumption |
| VCO <sub>2</sub> 2 <sup>nd</sup> intersect [mL/min] | Carbon dioxide production value of the 2 <sup>nd</sup> intersect when fitting three linear lines to the                                                               |

|                                   |                                                                                                                                                                   |
|-----------------------------------|-------------------------------------------------------------------------------------------------------------------------------------------------------------------|
|                                   | carbon dioxide production as a function of oxygen consumption                                                                                                     |
| V SLOP [mL/min]                   | The ventilatory anaerobic threshold determined using the V slope method                                                                                           |
| Time to the VAT [s]               | The time it takes to reach the ventilatory anaerobic threshold                                                                                                    |
| Relative aerobic time             | The time it takes to reach the ventilatory anaerobic threshold divided by the duration of the test                                                                |
| The anaerobic time [s]            | The time from the ventilatory anaerobic threshold to the end of the test                                                                                          |
| Relative time of VAT              | The time from the ventilatory anaerobic threshold to the end of the test divided by the duration of the test                                                      |
| VAT ratio                         | Oxygen consumption value at the ventilatory anaerobic threshold divided by the duration of the test                                                               |
| Ratio of VAT to RR                | Oxygen consumption value at the ventilatory anaerobic threshold divided by the maximal value of the respiratory quotient                                          |
| Slope VCO <sub>2</sub> versus VE  | Slope in the volume of carbon dioxide production as a function of minute ventilation graph                                                                        |
| Slope VO <sub>2</sub> versus VE   | Slope in the oxygen consumption volume as a function of VE graph                                                                                                  |
| Slope VO <sub>2</sub> versus time | Slope in the oxygen consumption volume as a function of time graph                                                                                                |
| Slope A                           | Slope of the volume of carbon dioxide production as a function of oxygen consumption volume graph up to the ventilatory anaerobic threshold                       |
| Slope B                           | Slope of the volume of carbon dioxide production as a function of oxygen consumption volume graph from the ventilatory anaerobic threshold to the end of the test |
| Area A                            | Area of the volume of carbon dioxide production as a function of oxygen consumption volume graph up to the ventilatory anaerobic threshold                        |
| Area B                            | Area of the volume of carbon dioxide production as a function of oxygen consumption volume graph from the ventilatory anaerobic threshold to the end of the test  |
| Slope RR versus time              | Slope of the respiratory quotient as a function of time graph                                                                                                     |
| Slope VT as a function of time    | Slope of the tidal volume as a function of time graph                                                                                                             |
| Slope 1 <sup>st</sup> minute      | Slope of the 1 <sup>st</sup> minute in the oxygen consumption volume as a function of time graph                                                                  |

|                                                                           |                                                                                                                                                                                          |
|---------------------------------------------------------------------------|------------------------------------------------------------------------------------------------------------------------------------------------------------------------------------------|
| VO <sub>2</sub> at 1 <sup>st</sup> minute [mL/min]                        | Oxygen consumption value at the 1 <sup>st</sup> minute in the oxygen consumption volume as a function of time graph                                                                      |
| Slope 2 <sup>nd</sup> minute                                              | Slope of the 2 <sup>nd</sup> minute in the oxygen consumption volume as a function of time graph                                                                                         |
| VO <sub>2</sub> at 2 <sup>nd</sup> minute [mL/min]                        | Oxygen consumption value at the 2 <sup>nd</sup> minute in the oxygen consumption volume as a function of time graph                                                                      |
| Slope 3 <sup>rd</sup> minute                                              | Slope of the 3 <sup>rd</sup> minute in the oxygen consumption volume as a function of time graph                                                                                         |
| VO <sub>2</sub> at 3 <sup>rd</sup> minute [mL/min]                        | Oxygen consumption value at the 3 <sup>rd</sup> minute in the oxygen consumption as a function of time graph                                                                             |
| Predicted VO <sub>2</sub> / the real VO <sub>2</sub>                      | The predicted maximal oxygen consumption value divided by the real value of the maximal oxygen consumption                                                                               |
| Predicted VO <sub>2</sub> at the VAT/ the real VO <sub>2</sub> at the VAT | The predicted maximal oxygen consumption value at the ventilatory anaerobic threshold divided by the real value of the maximal oxygen consumption at the ventilatory anaerobic threshold |
| Time at the VAT [s]                                                       | The time at the ventilatory anaerobic threshold                                                                                                                                          |
| RF at the VAT [1/min]                                                     | Respiratory frequency at the ventilatory anaerobic threshold                                                                                                                             |
| VT at the VAT [L]                                                         | Tidal volume at the ventilatory anaerobic threshold                                                                                                                                      |
| VE at the VAT [L/min]                                                     | Minute ventilation at the ventilatory anaerobic threshold                                                                                                                                |
| VCO <sub>2</sub> at the VAT [mL/min]                                      | Value of the carbon dioxide production at the ventilatory anaerobic threshold                                                                                                            |
| VO <sub>2</sub> at the VAT [mL/min/Kg]                                    | Oxygen consumption value at the ventilatory anaerobic threshold                                                                                                                          |
| RR at VAT                                                                 | The respiratory quotient at the ventilatory anaerobic threshold                                                                                                                          |
| Max slope * max speed                                                     | Maximal value of slope multiplies by the maximal value of speed                                                                                                                          |
| VE <sub>max</sub> /(max slope * speed)                                    | Maximal minute ventilation divided by the maximal value of slope multiplies by the maximal value of speed                                                                                |
| VO <sub>2</sub> max/(max slope * speed)                                   | Maximal value of oxygen consumption divided by the maximal value of slope multiplies by the maximal value of speed                                                                       |
| Predicted VO <sub>2</sub> max [mL/min/Kg]                                 | Predicted maximal oxygen consumption based on ACSM equation: VO <sub>2</sub> = 0.2 *(speed) + 0.9 (speed)*(fractional grade) + 3.5                                                       |

|               |                                                                                                        |
|---------------|--------------------------------------------------------------------------------------------------------|
| Max intensity | Maximal value of slope multiplied by the maximal value of speed multiplied by the duration of the test |
|---------------|--------------------------------------------------------------------------------------------------------|
