# Supplementary material for: Prediction of the Wingate anaerobic mechanical power outputs from a maximal incremental cardiopulmonary exercise stress test using machine-learning approach
Source: PubMed Central journal article supplement (PMC6413913; doi:10.1371/journal.pone.0212199), 2019-03-12
Supplement: pone.0212199.s002.pdf [file pone.0212199.s002.pdf]

**Table B in S2 File. Data of the selected features**

| Subject # | Max RF [l/min] | Max VO <sub>2</sub> [mL/min/Kg] | Max VE [L/min] | Slope VCO <sub>2</sub> versus VE | Slope 1st minute | Max slope * max speed | VO <sub>2</sub> max / (maximal slope * speed) | Peak power (w) | Mean power (w) |
|-----------|----------------|---------------------------------|----------------|----------------------------------|------------------|-----------------------|-----------------------------------------------|----------------|----------------|
| 1         | 62.5           | 57.7                            | 156.7          | 29.9                             | 22.2             | 130                   | 31.9                                          | 803.8          | 583.2          |
| 2         | 43.0           | 58.8                            | 126.4          | 42.8                             | 13.2             | 100                   | 39.8                                          | 768.4          | 528.1          |
| 3         | 49.9           | 54.1                            | 131.9          | 37.8                             | 25.5             | 130                   | 29.9                                          | 853.9          | 613.2          |
| 4         | 59.1           | 54.4                            | 151.5          | 31.6                             | 17.3             | 99                    | 40.7                                          | 687.2          | 497.9          |
| 5         | 57.0           | 43.8                            | 104.6          | 32.9                             | 6.7              | 70                    | 41.1                                          | 527.8          | 428.4          |
| 6         | 55.2           | 34.9                            | 90.9           | 32.1                             | 9.4              | 88                    | 26.6                                          | 477.2          | 344.4          |
| 7         | 43.7           | 39.7                            | 91.1           | 32.1                             | 5.9              | 90                    | 25.6                                          | 472.5          | 359.6          |
| 8         | 51.7           | 48.6                            | 80.9           | 35.9                             | 20.1             | 72                    | 35.1                                          | 357.3          | 259.2          |
| 9         | 43.2           | 41.3                            | 92.2           | 34.9                             | 11.7             | 40                    | 69.3                                          | 477.9          | 311.4          |
| 10        | 46.2           | 49.1                            | 96.2           | 34.5                             | -9.7             | 130                   | 24.5                                          | 775.2          | 576.0          |
| 11        | 35.6           | 38.2                            | 54.7           | 42.4                             | 4.9              | 64                    | 31.1                                          | 395.4          | 269.3          |
| 12        | 72.3           | 51.4                            | 167.3          | 27.4                             | 16.8             | 120                   | 33.2                                          | 833.5          | 673.1          |
| 13        | 42.9           | 53.5                            | 93.0           | 38.9                             | 18.0             | 110                   | 28.5                                          | 543.2          | 409.0          |
| 14        | 47.1           | 51.8                            | 160.3          | 38.3                             | 49.7             | 104                   | 51.3                                          | 1184.1         | 855.8          |
| 15        | 46.0           | 33.2                            | 80.5           | 36.8                             | 7.5              | 48                    | 54.2                                          | 508.7          | 370.8          |
| 16        | 49.1           | 55.5                            | 123.1          | 35.7                             | 22.0             | 120                   | 32.9                                          | 801.9          | 607.9          |
| 17        | 39.4           | 43.2                            | 82.2           | 41.4                             | 20.9             | 55                    | 49.1                                          | 626.7          | 478.7          |
| 18        | 50.3           | 44.4                            | 83.8           | 34.7                             | 9.2              | 66                    | 36.3                                          | 477.3          | 352.1          |
| 19        | 42.1           | 46.6                            | 79.6           | 34.0                             | -2.0             | 70                    | 41.2                                          | 427.5          | 344.8          |
| 20        | 35.8           | 42.6                            | 45.1           | 47.5                             | 1.8              | 60                    | 35.5                                          | 473.8          | 328.6          |
| 21        | 52.6           | 44.5                            | 151.0          | 34.0                             | 9.6              | 110                   | 36.4                                          | 975.7          | 772.7          |
| 22        | 46.0           | 47.7                            | 90.9           | 41.0                             | 15.4             | 90                    | 28.3                                          | 406.7          | 316.3          |
| 23        | 55.2           | 46.7                            | 110.9          | 34.3                             | 6.7              | 95                    | 31.9                                          | 618.5          | 452.4          |
| 24        | 33.7           | 53.5                            | 71.7           | 41.3                             | 2.7              | 70                    | 35.5                                          | 414.1          | 306.4          |
| 25        | 46.2           | 41.4                            | 79.9           | 39.4                             | 6.2              | 72                    | 36.5                                          | 473.4          | 362.6          |
| 26        | 57.0           | 69.4                            | 147.7          | 33.9                             | 18.2             | 112                   | 39.4                                          | 664.0          | 517.1          |
| 27        | 58.8           | 48.2                            | 94.4           | 37.3                             | 1.5              | 66                    | 44.6                                          | 525.0          | 416.1          |
| 28        | 48.5           | 38.5                            | 70.4           | 33.9                             | -2.0             | 54                    | 35.6                                          | 296.3          | 213.0          |
| 29        | 47.2           | 39.6                            | 80.9           | 35.6                             | 6.9              | 72                    | 35.2                                          | 442.2          | 329.4          |
| 30        | 72.7           | 42.0                            | 181.9          | 23.9                             | 16.9             | 104                   | 34.9                                          | 892.6          | 697.8          |
| 31        | 43.8           | 43.1                            | 97.0           | 31.1                             | 5.5              | 70                    | 39.6                                          | 507.1          | 372.9          |
| 32        | 45.3           | 46.4                            | 154.2          | 32.4                             | 18.4             | 96                    | 45.8                                          | 852.6          | 678.1          |
| 33        | 48.9           | 38.8                            | 96.6           | 26.9                             | 9.3              | 60                    | 36.2                                          | 367.0          | 279.6          |
| 34        | 52.2           | 51.2                            | 106.0          | 34.7                             | 18.6             | 99                    | 33.8                                          | 614.9          | 513.3          |
| 35        | 54.1           | 54.9                            | 153.9          | 29.7                             | 6.0              | 132                   | 31.6                                          | 851.6          | 653.7          |
| 36        | 44.8           | 41.1                            | 132.1          | 29.1                             | 16.1             | 80                    | 41.4                                          | 953.9          | 714.8          |
| 37        | 59.2           | 61.0                            | 146.8          | 28.4                             | 26.8             | 90                    | 45.1                                          | 635.9          | 517.3          |

|    |      |      |       |      |      |     |      |       |       |
|----|------|------|-------|------|------|-----|------|-------|-------|
| 38 | 44.7 | 41.2 | 95.4  | 28.5 | 14.1 | 72  | 34.0 | 522.7 | 353.4 |
| 39 | 44.7 | 41.7 | 86.0  | 34.9 | 7.0  | 54  | 46.4 | 394.1 | 304.2 |
| 40 | 40.3 | 41.9 | 78.3  | 36.4 | -2.5 | 40  | 63.9 | 308.4 | 221.3 |
| 41 | 49.3 | 41.0 | 78.9  | 30.1 | -1.5 | 36  | 60.4 | 363.6 | 265.1 |
| 42 | 49.9 | 42.7 | 135.7 | 34.8 | 16.8 | 66  | 56.9 | 780.8 | 571.9 |
| 43 | 43.5 | 43.7 | 92.5  | 32.6 | 14.9 | 55  | 47.6 | 430.2 | 332.7 |
| 44 | 41.9 | 46.7 | 142.3 | 35.1 | 25.0 | 88  | 50.4 | 929.4 | 702.8 |
| 45 | 44.1 | 38.1 | 75.2  | 37.2 | 1.6  | 70  | 38.1 | 440.5 | 313.2 |
| 46 | 52.4 | 45.2 | 146.9 | 31.0 | 1.3  | 100 | 35.3 | 753.8 | 588.9 |
| 47 | 47.0 | 43.6 | 92.2  | 34.9 | 7.8  | 66  | 39.6 | 429.9 | 345.2 |
| 48 | 59.2 | 61.0 | 146.8 | 28.4 | 26.8 | 90  | 45.1 | 635.9 | 521.4 |
| 49 | 59.1 | 64.8 | 147.0 | 35.2 | 3.2  | 105 | 40.7 | 708.2 | 540.7 |
| 50 | 46.2 | 30.6 | 78.2  | 34.2 | 2.2  | 72  | 26.4 | 481.5 | 356.5 |
| 51 | 45.6 | 46.1 | 113.6 | 34.1 | 41.1 | 88  | 40.9 | 796.5 | 620.9 |
| 52 | 45.5 | 56.8 | 124.9 | 39.8 | 21.6 | 84  | 44.6 | 627.8 | 441.7 |
| 53 | 52.7 | 36.3 | 89.6  | 29.9 | 0.9  | 40  | 51.7 | 312.4 | 211.6 |
| 54 | 66.9 | 85.0 | 176.4 | 38.1 | 16.6 | 154 | 42.5 | 774.5 | 624.0 |
| 55 | 66.7 | 53.7 | 147.0 | 27.7 | 2.9  | 84  | 44.3 | 724.2 | 524.0 |
| 56 | 68.5 | 61.1 | 160.4 | 34.2 | 14.6 | 90  | 54.2 | 915.7 | 729.7 |
| 57 | 61.2 | 58.0 | 168.1 | 34.3 | 10.4 | 116 | 37.8 | 738.6 | 609.1 |
| 58 | 62.2 | 48.6 | 186.8 | 23.3 | 6.9  | 72  | 62.7 | 987.8 | 703.9 |
| 59 | 52.5 | 55.2 | 152.7 | 33.2 | 15.1 | 112 | 38.2 | 813.2 | 623.0 |
| 60 | 76.9 | 68.6 | 134.6 | 35.1 | 3.5  | 74  | 56.6 | 623.7 | 446.9 |
| 61 | 59.2 | 51.1 | 126.7 | 32.7 | 11.6 | 60  | 62.5 | 589.2 | 407.0 |
| 62 | 60.9 | 54.2 | 173.7 | 29.8 | 9.2  | 112 | 39.0 | 796.9 | 517.5 |
| 63 | 53.6 | 58.0 | 101.0 | 40.3 | 0.1  | 110 | 29.9 | 541.7 | 408.0 |
| 64 | 61.7 | 59.8 | 138.4 | 31.8 | 8.0  | 144 | 26.2 | 625.6 | 426.3 |
| 65 | 55.8 | 47.3 | 96.0  | 28.8 | 3.5  | 90  | 31.1 | 376.2 | 270.2 |
| 66 | 67.0 | 70.3 | 159.6 | 27.9 | -0.3 | 120 | 35.0 | 665.8 | 512.8 |
| 67 | 72.3 | 63.8 | 168.4 | 31.9 | 5.9  | 84  | 60.7 | 844.8 | 646.2 |
| 68 | 62.4 | 50.6 | 165.2 | 26.4 | 5.4  | 126 | 30.2 | 812.5 | 589.2 |
| 69 | 67.0 | 58.0 | 126.8 | 33.3 | 5.7  | 78  | 48.4 | 474.0 | 376.3 |
| 70 | 71.6 | 60.7 | 174.7 | 31.6 | 16.2 | 64  | 81.9 | 898.0 | 703.1 |
| 71 | 59.1 | 59.7 | 165.0 | 33.9 | 7.9  | 144 | 33.2 | 851.3 | 636.8 |
| 72 | 57.5 | 47.3 | 90.2  | 31.3 | 2.5  | 46  | 56.6 | 437.5 | 323.8 |
| 73 | 59.3 | 53.9 | 154.5 | 27.9 | 14.8 | 126 | 32.3 | 670.0 | 474.4 |
| 74 | 67.9 | 48.1 | 95.5  | 36.8 | 10.8 | 52  | 56.5 | 398.7 | 298.4 |
| 75 | 60.6 | 49.1 | 172.2 | 24.5 | 6.7  | 84  | 48.3 | 561.3 | 397.3 |
| 76 | 43.7 | 37.8 | 117.5 | 37.0 | 7.5  | 57  | 62.5 | 842.6 | 542.7 |
| 77 | 51.3 | 48.9 | 150.8 | 27.1 | 9.0  | 78  | 53.2 | 823.2 | 603.8 |
| 78 | 50.3 | 59.4 | 129.6 | 43.6 | 9.0  | 104 | 43.5 | 779.3 | 555.1 |
| 79 | 63.2 | 65.9 | 155.5 | 36.4 | 9.7  | 168 | 25.5 | 694.7 | 550.0 |
| 80 | 59.4 | 64.3 | 139.4 | 38.9 | 10.8 | 120 | 36.5 | 694.8 | 495.0 |

|    |      |      |       |      |      |     |      |       |       |
|----|------|------|-------|------|------|-----|------|-------|-------|
| 81 | 63.3 | 54.5 | 162.3 | 32.6 | 11.6 | 84  | 56.9 | 809.3 | 589.5 |
| 82 | 47.6 | 47.4 | 85.2  | 38.8 | 9.4  | 69  | 38.5 | 459.7 | 370.6 |
| 83 | 57.7 | 61.9 | 155.1 | 36.2 | 6.5  | 108 | 44.6 | 731.7 | 466.4 |
| 84 | 60.5 | 64.9 | 153.5 | 44.4 | 10.6 | 128 | 37.3 | 801.4 | 607.1 |
| 85 | 72.1 | 62.2 | 147.6 | 37.2 | 7.9  | 140 | 32.4 | 801.4 | 592.7 |
| 86 | 58.8 | 42.4 | 123.3 | 36.7 | 0.9  | 40  | 92.0 | 721.6 | 450.8 |
| 87 | 57.6 | 31.2 | 101.8 | 25.1 | 3.5  | 48  | 55.8 | 547.9 | 416.8 |
| 88 | 65.9 | 64.1 | 120.5 | 31.9 | 4.4  | 81  | 43.6 | 406.5 | 312.9 |
