# Supplementary material for: Prediction of the Wingate anaerobic mechanical power outputs from a maximal incremental cardiopulmonary exercise stress test using machine-learning approach
Source: PubMed Central journal article supplement (PMC6413913; doi:10.1371/journal.pone.0212199), 2019-03-12
Supplement: pone.0212199.s003.pdf [file pone.0212199.s003.pdf]

| Subject # | Slope 1 <sup>st</sup> minute VE | VO <sub>2</sub> at 1 minute | Rf at 1 minute | HR at 1 minute | VO <sub>2</sub> at 1 min | VE at 1 minute | Slope 2 <sup>nd</sup> minute VE | VO <sub>2</sub> at 2 min | Rf at 2 min | HR at 2 min | VO <sub>2</sub> at 2 min | VE at 2 min | Slope 3 <sup>rd</sup> minute VE | VO <sub>2</sub> at 3 min | Rf at 3 min | HR at 3 min | VO <sub>2</sub> at 3 min | VE at 3 min | PP [w/kg] | MP [w/kg] |
|-----------|---------------------------------|-----------------------------|----------------|----------------|--------------------------|----------------|---------------------------------|--------------------------|-------------|-------------|--------------------------|-------------|---------------------------------|--------------------------|-------------|-------------|--------------------------|-------------|-----------|-----------|
| 1         | 0.2                             | 1209.5                      | 21.0           | 103.3          | 25.2                     | 38.3           | 0.2                             | 1810.5                   | 28.8        | 131.3       | 33.1                     | 56.3        | 0.2                             | 2063.7                   | 26.6        | 138.8       | 36.2                     | 61.0        | 11.2      | 8.1       |
| 2         | 0.2                             | 1129.3                      | 23.8           | 86.5           | 19.4                     | 27.0           | 0.2                             | 1678.9                   | 23.0        | 107.3       | 26.4                     | 37.9        | 0.2                             | 2230.2                   | 30.2        | 118.0       | 32.1                     | 51.2        | 11.3      | 7.8       |
| 3         | 0.2                             | 1069.6                      | 21.2           | 105.8          | 28.1                     | 31.7           | 0.2                             | 1357.2                   | 21.4        | 118.8       | 27.0                     | 35.6        | 0.2                             | 1831.3                   | 20.8        | 125.3       | 30.3                     | 47.9        | 12.2      | 8.5       |
| 4         | 0.8                             | 1437.0                      | 52.0           | 135.5          | 17.2                     | 50.3           | 0.5                             | 2299.3                   | 53.1        | 165.8       | 35.7                     | 69.6        | 0.4                             | 2796.7                   | 55.2        | 171.8       | 39.0                     | 86.4        | 9.3       | 6.7       |
| 5         | 0.7                             | 729.7                       | 18.6           | 89.3           | 15.2                     | 21.8           | 0.2                             | 1352.2                   | 31.7        | 127.5       | 27.4                     | 44.4        | 0.2                             | 1680.9                   | 25.1        | 147.5       | 29.4                     | 47.8        | 8.1       | 6.5       |
| 6         | 0.2                             | 755.3                       | 33.2           | 105.8          | 15.2                     | 28.4           | 0.1                             | 1053.4                   | 29.1        | 119.8       | 21.0                     | 34.3        | 0.1                             | 1228.9                   | 37.1        | 135.3       | 22.3                     | 40.6        | 7.1       | 5.1       |
| 7         | 0.1                             | 569.1                       | 25.7           | 108.3          | 13.2                     | 22.9           | 0.1                             | 622.5                    | 25.4        | 123.3       | 34.5                     | 23.2        | 0.1                             | 1090.9                   | 27.4        | 136.3       | 21.3                     | 38.2        | 8.2       | 6.2       |
| 8         | 0.4                             | 869.5                       | 34.3           | 110.2          | 25.7                     | 31.5           | 0.2                             | 1187.5                   | 33.6        | 140.5       | 30.5                     | 38.3        | 0.1                             | 1075.7                   | 38.2        | 153.0       | 31.0                     | 39.2        | 6.9       | 5.0       |
| 9         | 0.2                             | 1048.3                      | 29.1           | 115.8          | 17.6                     | 34.7           | 0.1                             | 1130.5                   | 31.8        | 131.0       | 17.9                     | 37.7        | 0.1                             | 1682.8                   | 34.7        | 142.3       | 29.3                     | 52.7        | 7.1       | 4.7       |
| 10        | -0.2                            | 279.4                       | 12.7           | 109.3          | 3.6                      | 9.8            | 0.0                             | 700.5                    | 19.7        | 136.0       | 13.1                     | 21.6        | 0.1                             | 1136.7                   | 44.6        | 144.5       | 21.5                     | 36.7        | 11.9      | 8.9       |
| 11        | 0.1                             | 416.1                       | 17.8           | 100.5          | 9.8                      | 13.5           | 0.1                             | 677.9                    | 17.3        | 133.3       | 17.7                     | 21.4        | 0.1                             | 1075.0                   | 21.1        | 153.0       | 26.4                     | 30.5        | 7.6       | 5.2       |
| 12        | 0.3                             | 1331.1                      | 34.2           | 91.5           | 21.0                     | 37.9           | 0.2                             | 1801.6                   | 30.6        | 107.3       | 26.3                     | 49.2        | 0.2                             | 2054.5                   | 34.4        | 111.3       | 29.1                     | 55.0        | 10.7      | 8.6       |
| 13        | 0.3                             | 985.9                       | 18.2           | 124.0          | 23.4                     | 29.0           | 0.1                             | 1085.1                   | 22.4        | 135.0       | 25.6                     | 30.2        | 0.1                             | 1332.6                   | 21.1        | 137.0       | 30.4                     | 35.0        | 9.4       | 7.1       |
| 14        | 0.8                             | 2400.6                      | 27.4           | 117.8          | 29.2                     | 61.7           | 0.4                             | 2827.7                   | 29.4        | 142.8       | 29.6                     | 70.5        | 0.3                             | 3245.5                   | 33.5        | 151.8       | 31.6                     | 83.6        | 11.5      | 8.3       |
| 15        | 0.1                             | 628.0                       | 22.8           | 99.8           | 10.6                     | 21.6           | 0.1                             | 736.4                    | 28.9        | 120.5       | 14.5                     | 25.4        | 0.1                             | 1200.4                   | 36.7        | 138.3       | 21.8                     | 38.3        | 6.4       | 4.6       |
| 16        | 0.2                             | 1655.6                      | 21.2           | 123.3          | 29.6                     | 41.1           | 0.1                             | 1905.2                   | 27.8        | 143.5       | 32.4                     | 47.9        | 0.1                             | 1815.3                   | 26.8        | 148.0       | 32.9                     | 43.5        | 11.3      | 8.6       |
| 17        | 0.4                             | 1071.6                      | 24.1           | 113.3          | 22.8                     | 34.1           | 0.2                             | 1460.9                   | 26.2        | 136.5       | 28.3                     | 41.1        | 0.2                             | 1701.4                   | 25.6        | 148.0       | 31.1                     | 47.1        | 10.1      | 7.7       |
| 18        | 0.2                             | 901.0                       | 41.2           | 102.3          | 22.3                     | 29.9           | 0.1                             | 1269.0                   | 43.6        | 120.8       | 29.4                     | 40.3        | 0.1                             | 1410.8                   | 41.2        | 140.5       | 29.1                     | 44.3        | 8.7       | 6.4       |
| 19        | -0.1                            | 205.6                       | 13.9           | 95.5           | 4.4                      | 7.9            | 0.1                             | 657.7                    | 33.4        | 111.8       | 15.1                     | 26.1        | 0.1                             | 871.1                    | 32.0        | 124.0       | 19.6                     | 31.2        | 6.9       | 5.6       |
| 20        | 0.1                             | 369.3                       | 19.5           | 115.3          | 8.3                      | 14.2           | 0.1                             | 591.8                    | 21.8        | 138.5       | 17.6                     | 19.8        | 0.1                             | 799.6                    | 24.0        | 157.3       | 24.5                     | 23.9        | 9.5       | 6.6       |
| 21        | 0.2                             | 1482.4                      | 29.6           | 95.8           | 16.7                     | 42.0           | 0.2                             | 2104.7                   | 35.0        | 122.3       | 24.0                     | 58.9        | 0.3                             | 2582.4                   | 35.4        | 134.5       | 27.4                     | 70.9        | 11.0      | 8.7       |
| 22        | 0.4                             | 1045.3                      | 44.7           | 114.3          | 24.3                     | 36.0           | 0.2                             | 1352.1                   | 41.0        | 143.0       | 27.6                     | 40.9        | 0.1                             | 1668.9                   | 36.3        | 152.0       | 32.3                     | 45.0        | 7.7       | 6.0       |
| 23        | 0.1                             | 1026.3                      | 20.7           | 101.0          | 16.3                     | 28.1           | 0.1                             | 1138.2                   | 19.6        | 110.5       | 18.1                     | 29.6        | 0.1                             | 1523.8                   | 19.3        | 125.3       | 25.8                     | 37.2        | 9.7       | 7.0       |
| 24        | 0.0                             | 519.4                       | 20.3           | 86.5           | 14.2                     | 15.8           | 0.0                             | 745.6                    | 12.4        | 95.8        | 20.1                     | 19.8        | 0.0                             | 1019.7                   | 33.0        | 115.9       | 26.8                     | 25.3        | 10.0      | 6.6       |
| 25        | 0.1                             | 618.7                       | 16.8           | 93.0           | 12.5                     | 18.0           | 0.1                             | 737.4                    | 22.7        | 103.0       | 15.6                     | 21.8        | 0.1                             | 1021.9                   | 25.1        | 118.0       | 21.1                     | 28.7        | 7.5       | 5.7       |
| 26        | 0.3                             | 1917.6                      | 30.5           | 124.5          | 43.2                     | 51.8           | 0.2                             | 2172.4                   | 31.1        | 150.8       | 42.1                     | 59.6        | 0.2                             | 2307.7                   | 36.5        | 156.0       | 44.3                     | 65.0        | 10.4      | 8.1       |
| 27        | 0.1                             | 634.2                       | 23.2           | 113.0          | 10.5                     | 18.9           | 0.2                             | 1264.9                   | 30.8        | 137.0       | 28.1                     | 34.7        | 0.2                             | 1607.7                   | 39.4        | 147.5       | 32.5                     | 43.2        | 8.6       | 6.8       |
| 28        | -0.1                            | 222.1                       | 25.8           | 93.4           | 5.1                      | 10.2           | 0.1                             | 536.9                    | 30.6        | 109.9       | 16.6                     | 20.1        | 0.1                             | 954.9                    | 33.9        | 128.3       | 22.2                     | 30.6        | 5.9       | 4.3       |
| 29        | 0.1                             | 766.3                       | 30.9           | 101.3          | 16.6                     | 23.1           | 0.1                             | 1104.7                   | 28.5        | 124.5       | 21.9                     | 32.6        | 0.1                             | 1434.1                   | 35.2        | 136.0       | 27.1                     | 42.2        | 7.0       | 5.2       |
| 30        | 0.3                             | 1352.3                      | 25.2           | 104.8          | 19.6                     | 44.1           | 0.2                             | 1645.6                   | 16.8        | 123.8       | 21.9                     | 49.2        | 0.2                             | 1684.0                   | 27.7        | 129.8       | 24.2                     | 53.9        | 10.4      | 8.1       |
| 31        | 0.2                             | 768.8                       | 17.7           | 90.8           | 13.1                     | 23.7           | 0.1                             | 894.5                    | 19.1        | 108.5       | 17.5                     | 25.6        | 0.1                             | 1416.6                   | 22.8        | 137.3       | 25.2                     | 38.7        | 7.8       | 5.8       |
| 32        | 0.2                             | 1206.0                      | 14.0           | 109.8          | 19.7                     | 30.1           | 0.4                             | 1949.3                   | 31.9        | 131.5       | 25.1                     | 55.5        | 0.3                             | 2409.9                   | 28.8        | 138.8       | 29.7                     | 67.1        | 9.0       | 7.2       |
| 33        | 0.1                             | 709.0                       | 19.5           | 96.3           | 17.2                     | 24.5           | 0.2                             | 1046.1                   | 29.6        | 115.5       | 22.9                     | 36.0        | 0.2                             | 1421.0                   | 33.3        | 127.3       | 26.8                     | 50.3        | 6.7       | 5.1       |
| 34        | 0.3                             | 1015.1                      | 23.6           | 93.8           | 22.6                     | 31.3           | 0.2                             | 1164.1                   | 33.1        | 113.3       | 24.6                     | 37.0        | 0.2                             | 1469.1                   | 37.2        | 116.8       | 28.3                     | 47.5        | 9.5       | 7.9       |
| 35        | 0.4                             | 2090.7                      | 31.1           | 112.3          | 36.2                     | 58.9           | 0.1                             | 2094.8                   | 31.9        | 136.8       | 35.6                     | 56.8        | 0.1                             | 2403.0                   | 36.0        | 146.3       | 38.8                     | 67.2        | 11.4      | 8.7       |
| 36        | 0.3                             | 1482.5                      | 28.9           | 97.5           | 24.7                     | 49.2           | 0.2                             | 1939.7                   | 29.9        | 121.5       | 28.5                     | 62.4        | 0.2                             | 2190.7                   | 30.4        | 129.3       | 30.5                     | 68.9        | 11.9      | 8.9       |
| 37        | 0.4                             | 1791.8                      | 38.1           | 123.0          | 35.4                     | 57.0           | 0.2                             | 2150.4                   | 39.8        | 147.3       | 39.8                     | 66.8        | 0.2                             | 2452.1                   | 39.2        | 153.5       | 44.1                     | 75.8        | 9.6       | 7.8       |
| 38        | 0.3                             | 1012.1                      | 24.3           | 106.5          | 20.7                     | 30.8           | 0.1                             | 1149.5                   | 22.7        | 128.0       | 21.6                     | 33.2        | 0.2                             | 1563.9                   | 21.3        | 143.8       | 27.0                     | 42.8        | 9.0       | 6.0       |
| 39        | 0.2                             | 740.4                       | 27.8           | 105.0          | 15.6                     | 26.6           | 0.1                             | 821.6                    | 28.6        | 133.3       | 18.7                     | 28.6        | 0.1                             | 1243.0                   | 32.6        | 155.0       | 27.0                     | 41.4        | 6.7       | 5.1       |
| 40        | 0.0                             | 354.1                       | 23.8           | 98.3           | 6.8                      | 12.6           | 0.1                             | 723.6                    | 23.0        | 124.0       | 16.3                     | 23.4        | 0.2                             | 1206.3                   | 25.0        | 145.8       | 24.8                     | 37.4        | 5.1       | 3.6       |
| 41        | 0.0                             | 366.8                       | 28.7           | 90.8           | 7.5                      | 14.6           | 0.1                             | 802.3                    | 33.3        | 125.5       | 21.7                     | 28.6        | 0.2                             | 1103.8                   | 31.0        | 156.8       | 25.4                     | 35.9        | 6.9       | 5.0       |
| 42        | 0.3                             | 2154.5                      | 36.5           | 122.5          | 31.0                     | 66.4           | 0.2                             | 2326.8                   | 33.6        | 141.3       | 32.0                     | 71.1        | 0.1                             | 2677.7                   | 36.0        | 153.0       | 34.6                     | 80.3        | 8.9       | 6.5       |
| 43        | 0.4                             | 1751.6                      | 31.1           | 129.0          | 30.9                     | 50.4           | 0.2                             | 1949.0                   | 34.5        | 155.0       | 31.7                     | 54.6        | 0.1                             | 2207.2                   | 35.4        | 165.8       | 36.3                     | 60.6        | 7.2       | 5.5       |
| 44        | 0.3                             | 1675.7                      | 21.6           | 94.5           | 24.4                     | 47.8           | 0.2                             | 1621.4                   | 19.6        | 113.8       | 22.2                     | 46.0        | 0.2                             | 2166.0                   | 28.2        | 124.3       | 28.3                     | 64.6        | 9.8       | 7.4       |
| 45        | 0.1                             | 1466.2                      | 29.9           | 110.5          | 25.7                     | 41.0           | 0.0                             | 1547.7                   | 29.7        | 129.5       | 27.6                     | 41.0        | 0.1                             | 1839.4                   | 35.1        | 138.5       | 29.3                     | 50.8        | 6.3       | 4.5       |
| 46        | 0.0                             | 794.2                       | 15.7           | 84.3           | 11.5                     | 20.4           | 0.1                             | 1089.8                   | 18.7        | 95.8        | 16.8                     | 27.7        | 0.1                             | 1239.5                   | 18.6        | 107.5       | 19.5                     | 30.4        | 9.7       | 7.5       |
| 47        | 0.1                             | 738.6                       | 23.9           | 81.5           | 14.9                     | 24.5           | 0.1                             | 1109.0                   | 25.7        | 108.5       | 21.9                     | 33.1        | 0.1                             | 1404.9                   | 28.7        | 126.3       | 26.9                     | 39.8        | 7.2       | 5.8       |
| 48        | 0.4                             | 1791.8                      | 38.1           | 142.0          | 35.4                     | 57.0           | 0.2                             | 2150.4                   | 39.8        | 149.0       | 39.8                     | 66.8        | 0.2                             | 2452.1                   | 39.2        | 155.0       | 44.1                     | 75.8        | 9.6       | 7.8       |
| 49        | 0.1                             | 581.5                       | 21.1           | 113.0          | 8.1                      | 17.3           | 0.4                             | 1882.8                   | 38.9        | 137.5       | 32.9                     | 53.5        | 0.3                             | 1961.3                   | 34.4        | 144.3       | 33.8                     | 51.4        | 10.9      | 8.3       |
| 50        | 0.0                             | 543.3                       | 20.3           | 103.0          | 10.5                     | 16.4           | 0.1                             | 682.7                    | 22.0        | 125.8       | 13.5                     | 21.2        | 0.1                             | 1071.0                   | 25.8        | 150.0       | 20.1                     | 31.8        | 7.6       | 5.8       |
| 51        | 0.7                             | 1190.9                      | 24.1           | 115.3          | 25.8                     | 36.3           | 0.5                             | 1821.5                   | 32.7        | 141.5       | 28.7                     | 54.5        | 0.3                             | 2041.4                   | 29.1        | 152.5       | 29.6                     | 60.6        | 10.3      | 8.0       |
| 52        | 0.3                             | 2158.3                      | 24.2           | 128.0          | 34.7                     | 49.5           | 0.2                             | 2703.8                   | 34.7        | 148.3       | 39.0                     | 63.2        | 0.2                             | 3061.9                   | 28.0        | 152.8       | 40.4                     | 67.4        | 9.5       | 6.7       |
| 53        | 0.1                             | 439.8                       | 27.6           | 105.0          | 7.9                      | 18.0           | 0.1                             | 579.3                    | 21.1        | 127.5       | 13.6                     | 20.4        | 0.1                             | 1041.6                   | 28.5        | 140.8       | 22.7                     | 35.1        | 5.5       | 3.7       |
| 54        | 0.4                             | 1493.0                      | 29.9           | 111.0          | 20.2                     | 38.7           | 0.2                             | 2283.0                   | 37.0        | 128.0       | 32.9                     | 55.6        | 0.2                             | 2621.0                   | 39.2        | 126.0       | 34.7                     | 66.8        | 10.1      | 8.1       |
| 55        | 0.1                             | 1738.0                      | 32.3           | 127.0          | 30.0                     | 47.4           | 0.1                             | 2077.0                   | 39.6        | 143.0       | 34.0                     | 56.9        | 0.1                             | 2375.0                   | 30.1        | 157.0       | 36.6                     | 62.5        | 10.4      | 7.6       |
| 56        | 0.1                             | 1697.0                      | 30.5           | 106.0          | 28.8                     | 47.8           | 0.2                             | 2051.0                   | 29.5        | 115.0       | 35.0                     | 54.6        | 0.2                             | 2359.0                   | 36.1        | 132.0       | 35.8                     | 63.9        | 11.5      | 9.1       |
| 57        | 0.2                             | 1664.0                      | 34.5           | 107.0          | 29.0                     | 46.7           | 0.2                             | 1676.0                   | 33.6        | 120.0       | 25.5                     | 48.9        | 0.1                             | 2566.0                   | 42.3        | 128.0       | 42.3                     | 73.1        | 9.8       | 8.1       |
| 58        | 0.0                             | 2220.0                      | 21.4           | 137.0          | 29.0                     | 55.4           | 0.1                             | 2658.0                   | 23.9        | 148.0       | 32.4                     | 65.6        | 0.1                             | 2945.0                   | 24.9        | 156.0       | 33.8                     | 70.1        | 10.6      | 7.6       |
| 59        | 0.3                             | 1718.0                      | 32.3           | 128.0          | 28.9                     | 53.2           | 0.2                             | 2329.0                   | 32.1        | 141.0       | 35.7                     | 68.6        | 0.2                             | 2449.0                   | 32.9        | 152.0       | 35.7                     | 71.4        | 10.5      | 8.0       |
| 60        | 0.0                             | 2418.0                      | 60.0           | 147.0          | 44.7                     | 67.9           | 0.0                             | 2549.0                   | 62.5        | 152.0       | 46.9                     | 72.4        | 0.1                             | 2708.0                   | 40.0        | 157.0       | 47.9                     | 72.9        | 10.2      | 7.3       |
| 61        | 0.3                             | 1976.0                      | 34.6           | 150.0          | 31.5                     | 53.8           | 0.3                             | 2242.0                   | 38.6        | 165.0       | 33.6                     | 61.2        | 0.2                             | 2695.0                   | 34.0        | 172.0       | 37.9                     | 69.2        | 8.2       | 5.7       |
| 62        | 0.2                             | 1604.0                      | 24.8           | 92.0           | 23.0                     | 43.0           | 0.2                             | 2022.0                   | 27.3        | 108.0       | 28.0                     | 51.3        | 0.2                             | 2361.0                   | 32.6        |             |                          |             |           |           |
